# Supplementary material for: SMAD4 Protein Expression Is Downregulated in Ileal Epithelial Cells from Patients with Crohn’s Disease with Significant Inverse Correlation to Disease Activity
Source: Hindawi journal article supplement (doi:10.1155/2018/9307848), 2018-01-01
Supplement: f1 [file 9307848.f1.pdf]

**Supplementary Figure 1**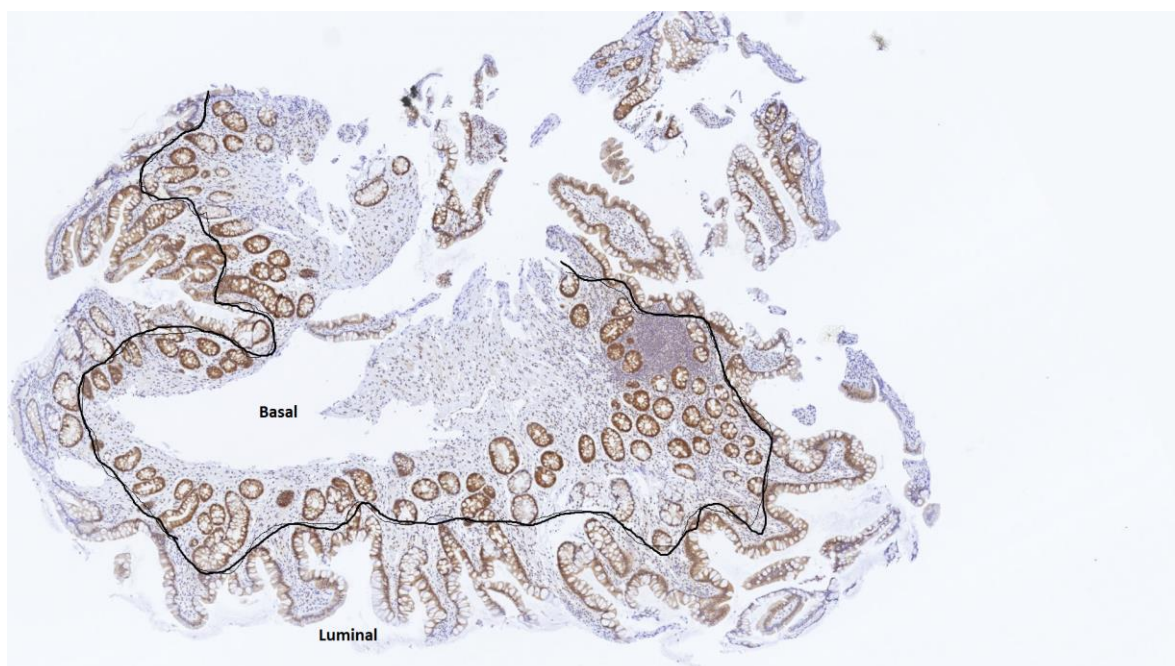

**Supplementary Figure 1.** Immunohistochemical staining of SMAD4 on an ileal biopsy from a rCD patient. Luminal and basal part of the biopsy is separated by a black drawing.
